# Supplementary material
Source: Elsevier journal article supplement (https://www.sciencedirect.com/science/article/pii/S1575181321000152)
Supplement: mmc1 [file S1575181321000152:mmc1.doc]

**Annex: Survey**

Medical school year (only in students’ survey):

- 4th.
- 5th.
- 6th.

In which type of University have you studied the Medicine Degree?

- Public.
- Private.

How many months have you spent as a student in surgical services or medical-surgical services? (Summer practices and international rotations are not included):

As a student, point how many times you have performed the following items (summer practices and international rotations are not included):

|  | Never | 1-5 times | 6 -10 times | >10 times |
| --- | --- | --- | --- | --- |
| Incisions |  |  |  |  |
| Drainage of collections |  |  |  |  |
| Suture removal |  |  |  |  |
| Suturing |  |  |  |  |
| Surgical hemostasis |  |  |  |  |
| Wounds cleaning |  |  |  |  |
| Burns care |  |  |  |  |
| Preparation of a sterile field |  |  |  |  |

Do you consider to choose a surgical or medical-surgical residency program?:

- Yes.
- No.
- I do not know/I do not answer.

Do you permit to use these data in a study of the surgical practice in the Medicine Degree in Spain?:

- Yes.
- No.
